# Supplementary material
Source: HighWire-hosted journal article supplement (http://molpharm.aspetjournals.org/highwire/filestream/76907/field_highwire_adjunct_files/3/Supplemental_Figure_4.pdf)
Supplement: Supplemental_Figure_4.pdf [file Supplemental_Figure_4.pdf]

## Supplemental Figure 4

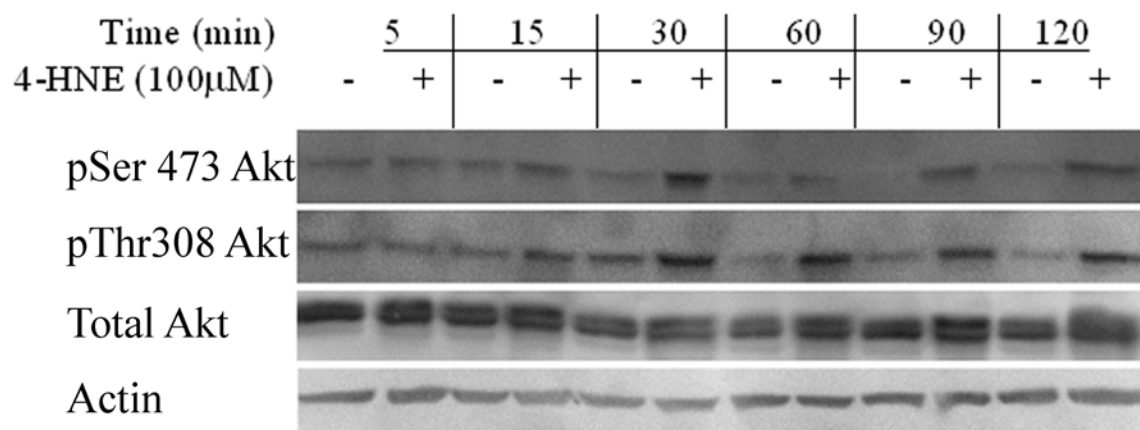

**Shearn C.T. et al., PTEN Inhibition by 4-Hydroxynonenal Leads to Increased Akt Activation in Hepatocytes. Molecular Pharmacology**

**Supplemental Figure 4. Akt activation by 4-HNE in primary hepatocytes is time dependent.** Primary hepatocytes were washed twice in serum free media and placed in serum free media containing 100 $\mu$ M 4-HNE or serum free media alone from 5-120 minutes in serum free media. Cells were lysed and examined via Western Blotting for pSer473 Akt, pThr308 Akt, total Akt and actin.
